# Supplementary material
Source: Research Square preprint supplement (doi:10.21203/rs.3.rs-9113160/v1)
Supplement: Supplementary file 1 [file 35b4b4df7f3dfb736da6666b.pdf]

# Supplementary Materials

*DFT-Assisted Spectroscopic Characterization, Reactivity Analysis, and Biological Interaction Study of 3-Bromo-N-tert-butylbenzene-1-sulfonamide (BTBS)*

## I. Optimized Geometrical Parameters

**ST 1:** Selected optimized geometrical parameters of BTBS (bond lengths in Å, bond angles and dihedral angles in °).

| No. | Bond Atoms | Bond Length | Angle Atoms | Bond Angle | Dihedral Atoms      | Dihedral Angle |
|-----|------------|-------------|-------------|------------|---------------------|----------------|
| 1   | Br1–C13    | 1.916       | Br1–C13–C11 | 119.225    | Br1–C13–C11–<br>C15 | 179.865        |
| 2   | S2–O3      | 1.464       | Br1–C13–C15 | 119.368    | S2–C10–C11–C12      | 176.685        |
| 3   | S2–O4      | 1.463       | O3–S2–O4    | 120.701    | C10–C11–C13–<br>H26 | 179.694        |
| 4   | S2–N5      | 1.680       | O3–S2–N5    | 112.235    | C10–C12–C14–<br>H27 | 180.063        |
| 5   | S2–C10     | 1.807       | O3–S2–C10   | 106.386    | C12–C14–C15–<br>H28 | 180.001        |
| 6   | N5–C6      | 1.499       | O4–S2–N5    | 104.443    | C13–C15–C14–<br>H29 | 180.064        |
| 7   | N5–H16     | 1.016       | O4–S2–C10   | 108.171    | Br1–C13–C11–<br>C10 | 179.459        |
| 8   | C6–C7      | 1.537       | N5–S2–C10   | 103.618    | Br1–C13–C11–<br>H26 | 359.765        |
| 9   | C6–C8      | 1.534       | S2–N5–C6    | 125.244    | Br1–C13–C15–<br>C14 | 180.140        |
| 10  | C6–C9      | 1.539       | S2–N5–H16   | 106.622    | Br1–C13–C15–<br>H29 | 0.204          |
| 11  | C7–H17     | 1.092       | S2–C10–C11  | 119.189    | O3–S2–N5–C6         | 340.012        |
| 12  | C7–H18     | 1.093       | S2–C10–C12  | 118.859    | O3–S2–N5–H16        | 115.433        |
| 13  | C7–H19     | 1.095       | C6–N5–H16   | 113.100    | O3–S2–C10–C11       | 172.142        |
| 14  | C8–H20     | 1.091       | N5–C6–C7    | 104.545    | O3–S2–C10–C12       | 348.928        |
| 15  | C8–H21     | 1.092       | N5–C6–C8    | 109.973    | O4–S2–N5–C6         | 207.569        |
| 16  | C8–H22     | 1.093       | N5–C6–C9    | 111.625    | O4–S2–N5–H16        | 342.990        |
| 17  | C9–H23     | 1.094       | C7–C6–C8    | 109.622    | O4–S2–C10–C11       | 303.184        |
| 18  | C9–H24     | 1.094       | C7–C6–C9    | 110.052    | O4–S2–C10–C12       | 119.970        |
| 19  | C9–H25     | 1.090       | C6–C7–H17   | 110.954    | C10–S2–N5–C6        | 94.381         |

| No. | Bond Atoms | Bond Length | Angle Atoms | Bond Angle | Dihedral Atoms | Dihedral Angle |
|-----|------------|-------------|-------------|------------|----------------|----------------|
| 20  | C10-C11    | 1.394       | C6-C7-H18   | 109.924    | C10-S2-N5-H16  | 229.802        |
| 21  | C10-C12    | 1.390       | C6-C7-H19   | 111.156    | N5-S2-C10-C11  | 53.648         |
| 22  | C11-C13    | 1.389       | C8-C6-C9    | 110.837    | N5-S2-C10-C12  | 230.434        |
| 23  | C11-H26    | 1.081       | C6-C8-H20   | 111.659    | S2-N5-C6-C7    | 186.588        |
| 24  | C12-C14    | 1.394       | C6-C8-H21   | 111.030    | S2-N5-C6-C8    | 304.197        |
| 25  | C12-H27    | 1.082       | C6-C8-H22   | 109.197    | S2-N5-C6-C9    | 67.647         |
| 26  | C13-C15    | 1.395       | C6-C9-H23   | 110.662    | S2-C10-C11-C13 | 177.283        |
| 27  | C14-C15    | 1.392       | C6-C9-H24   | 110.093    | S2-C10-C11-H26 | 356.978        |
| 28  | C14-H28    | 1.084       | C6-C9-H25   | 111.072    | S2-C10-C12-C14 | 182.928        |
| 29  | C15-H29    | 1.082       | H17-C7-H18  | 108.667    | S2-C10-C12-H27 | 2.990          |
| 30  | -          | -           | H17-C7-H19  | 108.450    | H16-N5-C6-C7   | 53.574         |
| 31  | -          | -           | H18-C7-H19  | 107.591    | H16-N5-C6-C8   | 171.183        |
| 32  | -          | -           | H20-C8-H21  | 108.942    | H16-N5-C6-C9   | 294.633        |
| 33  | -          | -           | H20-C8-H22  | 107.684    | N5-C6-C7-H17   | 60.531         |
| 34  | -          | -           | H21-C8-H22  | 108.211    | N5-C6-C7-H18   | 180.753        |
| 35  | -          | -           | H23-C9-H24  | 107.870    | N5-C6-C7-H19   | 299.763        |
| 36  | -          | -           | H23-C9-H25  | 108.388    | N5-C6-C8-H20   | 66.811         |
| 37  | -          | -           | H24-C9-H25  | 108.665    | N5-C6-C8-H21   | 305.016        |
| 38  | -          | -           | C11-C10-C12 | 121.871    | N5-C6-C8-H22   | 185.781        |
| 39  | -          | -           | C10-C11-C13 | 118.121    | N5-C6-C9-H23   | 57.049         |
| 40  | -          | -           | C10-C11-H26 | 120.783    | N5-C6-C9-H24   | 176.203        |
| 41  | -          | -           | C10-C12-C14 | 118.767    | N5-C6-C9-H25   | 296.611        |
| 42  | -          | -           | C10-C12-H27 | 119.802    | C8-C6-C7-H17   | 302.682        |
| 43  | -          | -           | C13-C11-H26 | 121.095    | C8-C6-C7-H18   | 62.904         |
| 44  | -          | -           | C11-C13-C15 | 121.407    | C8-C6-C7-H19   | 181.914        |
| 45  | -          | -           | C14-C12-H27 | 121.432    | C7-C6-C8-H20   | 181.220        |
| 46  | -          | -           | C12-C14-C15 | 120.627    | C7-C6-C8-H21   | 59.426         |
| 47  | -          | -           | C12-C14-H28 | 119.831    | C7-C6-C8-H22   | 300.191        |
| 48  | -          | -           | C13-C15-C14 | 119.204    | C9-C6-C7-H17   | 180.531        |
| 49  | -          | -           | C13-C15-H29 | 120.164    | C9-C6-C7-H18   | 300.753        |
| 50  | -          | -           | C15-C14-H28 | 119.542    | C9-C6-C7-H19   | 59.763         |
| 51  | -          | -           | C14-C15-H29 | 120.632    | C7-C6-C9-H23   | 301.436        |
| 52  | -          | -           | -           | -          | C7-C6-C9-H24   | 60.590         |
| 53  | -          | -           | -           | -          | C7-C6-C9-H25   | 180.998        |
| 54  | -          | -           | -           | -          | C9-C6-C8-H20   | 302.901        |
| 55  | -          | -           | -           | -          | C9-C6-C8-H21   | 181.107        |
| 56  | -          | -           | -           | -          | C9-C6-C8-H22   | 61.871         |
| 57  | -          | -           | -           | -          | C8-C6-C9-H23   | 180.008        |
| 58  | -          | -           | -           | -          | C8-C6-C9-H24   | 299.162        |
| 59  | -          | -           | -           | -          | C8-C6-C9-H25   | 59.570         |

| No. | Bond Atoms | Bond Length | Angle Atoms | Bond Angle | Dihedral Atoms      | Dihedral Angle |
|-----|------------|-------------|-------------|------------|---------------------|----------------|
| 60  | –          | –           | –           | –          | C12–C10–C11–<br>C13 | 0.598          |
| 61  | –          | –           | –           | –          | C12–C10–C11–<br>H26 | 180.293        |
| 62  | –          | –           | –           | –          | C11–C10–C12–<br>C14 | 359.623        |
| 63  | –          | –           | –           | –          | C11–C10–C12–<br>H27 | 179.685        |
| 64  | –          | –           | –           | –          | C10–C11–C13–<br>C15 | 359.593        |
| 65  | –          | –           | –           | –          | C10–C12–C14–<br>C15 | 359.955        |
| 66  | –          | –           | –           | –          | C10–C12–C14–<br>H28 | 179.956        |
| 67  | –          | –           | –           | –          | H26–C11–C13–<br>C15 | 179.899        |
| 68  | –          | –           | –           | –          | C11–C13–C15–<br>C14 | 0.005          |
| 69  | –          | –           | –           | –          | C11–C13–C15–<br>H29 | 180.069        |
| 70  | –          | –           | –           | –          | H27–C12–C14–<br>C15 | 179.892        |
| 71  | –          | –           | –           | –          | H27–C12–C14–<br>H28 | 359.893        |
| 72  | –          | –           | –           | –          | C12–C14–C15–<br>C13 | 0.226          |
| 73  | –          | –           | –           | –          | C12–C14–C15–<br>H29 | 180.163        |
| 74  | –          | –           | –           | –          | C13–C15–C14–<br>H28 | 180.226        |
| 75  | –          | –           | –           | –          | H28–C14–C15–<br>H29 | 0.162          |

## II. Fukui Functions and Dual-Descriptors Analysis

**ST 2:** Fukui function and dual descriptor ( $\Delta f$ ) values derived from DFT–NPA, indicating electrophilic and nucleophilic reactive sites within the title molecule.

| Atoms | N+1 (Anion) | N (Neutral) | N–1 (Cation) | $f^+(\vec{r})$ | $f^-(\vec{r})$ | $f^0(\vec{r})$ | $\Delta f$ |
|-------|-------------|-------------|--------------|----------------|----------------|----------------|------------|
| Br1   | -0.00435    | 0.07825     | 0.30876      | -0.08260       | -0.23051       | -0.15655       | 0.14791    |
| S2    | 2.20010     | 2.21050     | 2.18621      | -0.01040       | 0.02429        | 0.00694        | -0.03469   |
| O3    | -0.96030    | -0.92099    | -0.84204     | -0.03931       | -0.07895       | -0.05913       | 0.03964    |
| O4    | -0.95239    | -0.91048    | -0.82940     | -0.04191       | -0.08108       | -0.06149       | 0.03917    |
| N5    | -0.90838    | -0.89710    | -0.74488     | -0.01128       | -0.15222       | -0.08175       | 0.14094    |
| C6    | 0.10651     | 0.11775     | 0.11839      | -0.01124       | -0.00064       | -0.00594       | -0.01060   |
| C7    | -0.58244    | -0.57277    | -0.57775     | -0.00967       | 0.00498        | -0.00234       | -0.01465   |
| C8    | -0.59311    | -0.59102    | -0.59550     | -0.00209       | 0.00448        | 0.00120        | -0.00657   |
| C9    | -0.59541    | -0.59174    | -0.57878     | -0.00367       | -0.01296       | -0.00832       | 0.00929    |
| C10   | -0.36995    | -0.24804    | -0.21336     | -0.12191       | -0.03468       | -0.07830       | -0.08723   |
| C11   | -0.27890    | -0.20852    | -0.21216     | -0.07038       | 0.00364        | -0.03337       | -0.07402   |
| C12   | -0.22747    | -0.19441    | -0.08920     | -0.03306       | -0.10521       | -0.06914       | 0.07215    |
| C13   | -0.09519    | -0.10020    | -0.07326     | 0.00501        | -0.02694       | -0.01096       | 0.03195    |
| C14   | -0.23110    | -0.17902    | -0.18280     | -0.05208       | 0.00378        | -0.02415       | -0.05586   |
| C15   | -0.37257    | -0.20622    | -0.11025     | -0.16635       | -0.09597       | -0.13116       | -0.07038   |
| H16   | 0.37495     | 0.40265     | 0.42193      | -0.02770       | -0.01928       | -0.02349       | -0.00842   |
| H17   | 0.19939     | 0.21067     | 0.21553      | -0.01128       | -0.00486       | -0.00807       | -0.00642   |
| H18   | 0.12560     | 0.20899     | 0.23244      | -0.08339       | -0.02345       | -0.05342       | -0.05994   |
| H19   | 0.15200     | 0.19913     | 0.21224      | -0.04713       | -0.01311       | -0.03012       | -0.03402   |
| H20   | 0.22200     | 0.21761     | 0.21634      | 0.00439        | 0.00127        | 0.00283        | 0.00312    |
| H21   | 0.21493     | 0.20938     | 0.20996      | 0.00555        | -0.00058       | 0.00249        | 0.00613    |
| H22   | 0.18579     | 0.20874     | 0.23407      | -0.02295       | -0.02533       | -0.02414       | 0.00238    |
| H23   | 0.17775     | 0.19923     | 0.21402      | -0.02148       | -0.01479       | -0.01813       | -0.00669   |
| H24   | 0.16139     | 0.20168     | 0.23013      | -0.04029       | -0.02845       | -0.03437       | -0.01184   |
| H25   | 0.22611     | 0.22992     | 0.23425      | -0.00381       | -0.00433       | -0.00407       | 0.00052    |
| H26   | 0.21997     | 0.24239     | 0.25791      | -0.02242       | -0.01552       | -0.01897       | -0.00690   |
| H27   | 0.21887     | 0.24244     | 0.26108      | -0.02357       | -0.01864       | -0.02110       | -0.00493   |
| H28   | 0.18773     | 0.21594     | 0.24650      | -0.02821       | -0.03056       | -0.02938       | 0.00235    |
| H29   | 0.19846     | 0.22522     | 0.24964      | -0.02676       | -0.02442       | -0.02559       | -0.00234   |

### III. Electron Localization Analysis

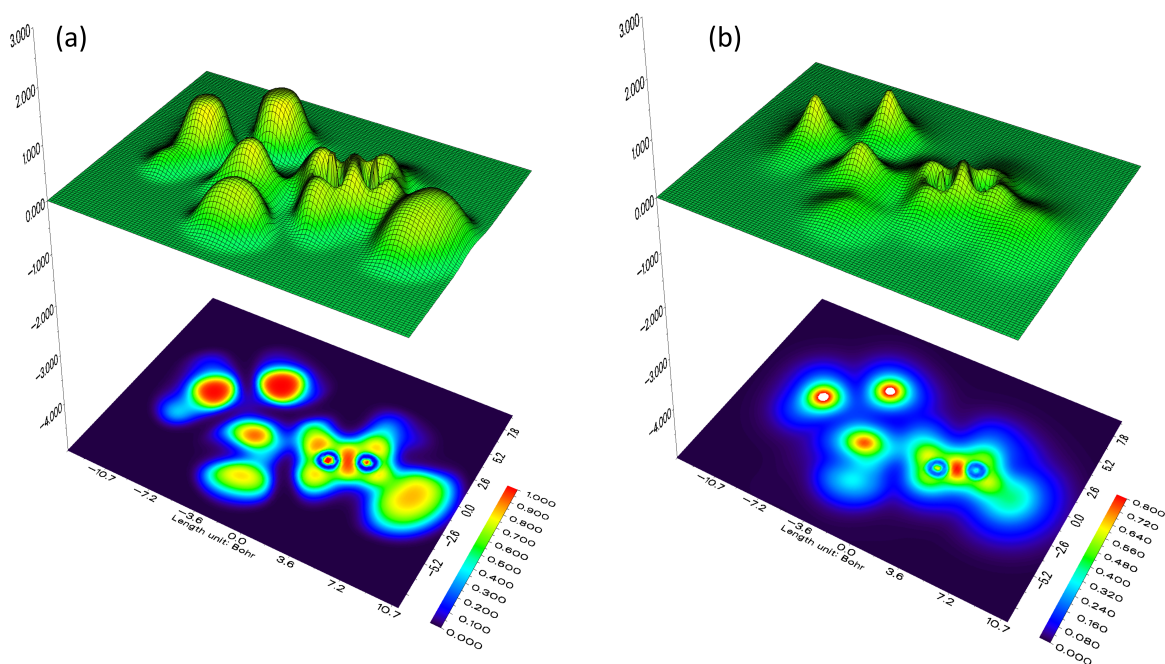

**SF 1:** Three-dimensional ELF (a) and LOL (b) maps of BTBS highlighting electron localization features.

### IV. Molecular Docking Interaction Summary

**ST 3:** Protein–ligand interaction profile of BTBS. Interaction types: Hydrophobic (Alkyl –  $\beta$ , Pi–Alkyl –  $\alpha$ , Pi–Sulphur –  $\gamma$ ), Pi–Sigma –  $\delta$ , H-bond (Conventional –  $\zeta_1$ , Carbon H-bond –  $\zeta_2$ ,  $\pi$ -donor H-bond –  $\zeta_3$ ),  $\pi$ - $\pi$  stacked –  $\epsilon$ , and  $\pi$ -cation –  $\Theta$ .

| Protein (PDB ID) | Bonded Residue | Interaction(s)   | Bond Distance (Å)  | Estimated $K_i$ (mM) | Binding Energy (kcal/mol) | RMSD (Å) |
|------------------|----------------|------------------|--------------------|----------------------|---------------------------|----------|
| 1U9V             | TYR67          | $\delta, \alpha$ | 3.94, (4.72, 5.29) | 1.98                 | -7.78                     | 63.328   |
|                  | ALA134         | $\alpha$         | 4.29               |                      |                           |          |
|                  | ALA163         | $\alpha$         | 5.29               |                      |                           |          |
|                  | LEU160         | $\beta$          | 4.29               |                      |                           |          |
|                  | LEU209         | $\beta$          | 4.78               |                      |                           |          |
|                  | GLY66          | $\zeta_1$        | 1.94               |                      |                           |          |
|                  | TRP26          | $\zeta_2$        | 3.77               |                      |                           |          |
|                  | CYS25          | $\gamma$         | 5.94               |                      |                           |          |

| Protein<br>(PDB<br>ID) | Bonded<br>Residue | Interaction(s)                      | Bond Distance<br>(Å)        | Estimated $K_i$<br>(mM) | Binding<br>Energy<br>(kcal/mol) | RMSD (Å) |
|------------------------|-------------------|-------------------------------------|-----------------------------|-------------------------|---------------------------------|----------|
| 3KS3                   | HIS119            | $\gamma$                            | 5.94                        | 2.12                    | -7.74                           | 15.460   |
|                        | HIS96             | $\gamma$                            | 5.45                        |                         |                                 |          |
|                        | HIS64             | $\alpha$                            | 4.11                        |                         |                                 |          |
|                        | HIS94             | $\epsilon, \alpha$                  | 4.06, (3.97,<br>5.33, 4.70) |                         |                                 |          |
|                        | GLN92             | $\zeta_3$                           | 3.24                        |                         |                                 |          |
|                        | ALA65             | $\beta$                             | 3.28                        |                         |                                 |          |
|                        | VAL143            | $\beta$                             | 3.40, 4.94                  |                         |                                 |          |
|                        | VAL121            | $\beta$                             | 4.20, 4.42                  |                         |                                 |          |
|                        | LEU198            | $\beta$                             | 4.72, 4.64                  |                         |                                 |          |
|                        | TRP209            | $\alpha$                            | 5.30, 4.49                  |                         |                                 |          |
|                        | THR199            | $\zeta_1$                           | 2.07                        |                         |                                 |          |
| THR200                 | $\zeta_1$         | 2.21                                |                             |                         |                                 |          |
| 5E2R                   | HIS94             | $\zeta_1, \epsilon, \Theta, \alpha$ | 1.84, (3.87,<br>3.58, 4.70) | 2.94                    | -7.55                           | 15.248   |
|                        | HIS96             | $\zeta_1, \gamma, \alpha$           | 1.95, (5.01,<br>4.44)       |                         |                                 |          |
|                        | HIS119            | $\zeta_1, \alpha$                   | 1.94, (4.33)                |                         |                                 |          |
|                        | THR199            | $\zeta_1$                           | 1.85, 2.59                  |                         |                                 |          |
|                        | THR200            | $\zeta_1, \delta$                   | 2.59, (3.74)                |                         |                                 |          |
|                        | ALA65             | $\beta, \alpha$                     | 3.46, (5.28)                |                         |                                 |          |
|                        | VAL207            | $\beta$                             | 4.78                        |                         |                                 |          |
|                        | VAL121            | $\beta$                             | 3.59, 4.31                  |                         |                                 |          |
|                        | VAL143            | $\beta$                             | 3.29, 4.10                  |                         |                                 |          |
|                        | LEU141            | $\beta$                             | 5.07                        |                         |                                 |          |
|                        | LEU198            | $\beta$                             | 4.35, 4.76                  |                         |                                 |          |
|                        | TRP209            | $\alpha$                            | 4.70, 4.79, 5.50            |                         |                                 |          |

## V.NCI-60 Anticancer Activity Prediction

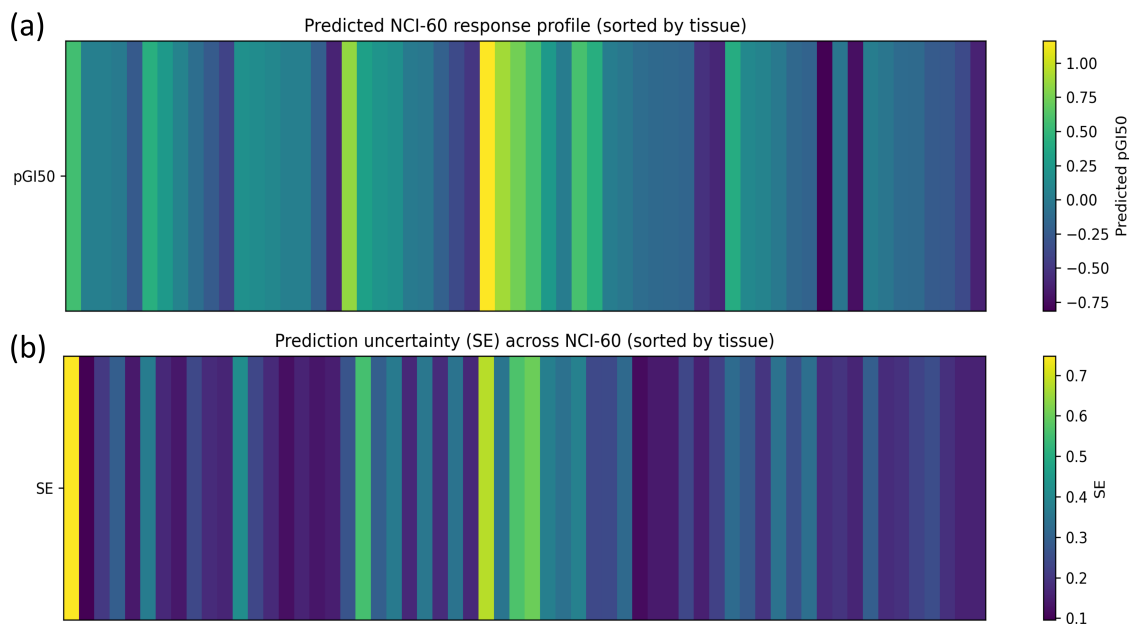

**SF 2:** Predicted NCI-60 response profile (a) and corresponding prediction uncertainty (b) for BTBS across the NCI-60 cancer cell line panel, ordered by tissue group. Lower standard error indicates higher prediction precision.

### Data Source

NCI-60/DTP GI<sub>50</sub>/pGI<sub>50</sub> pharmacological data were obtained from the CellMiner and CellMinerCDB databases. Prediction uncertainty was evaluated using a similarity-weighted neighborhood approach, where lower standard error corresponds to higher prediction confidence.
